# Supplementary material for: Influence of nonylphenol exposure on basic growth, development, and thyroid tissue structure in F1 male rats
Source: PeerJ. 2019 Jun 17;7:e7039. doi: 10.7717/peerj.7039 (PMC6586153; doi:10.7717/peerj.7039)
Supplement: Supplemental Information 1 [file peerj-07-7039-s001.xls]

## Sheet: height ,Tail length ,Anal colon
number	height	Tail length	Anal colon
C6-1	4.6	1.6	0.2
C6-2	5.3	1.8	0.4
C6-3	5.2	1.6	0.4
C6-4	5.1	1.7	0.6
C6-5	5.6	1.7	0.4
C6-6	5.2	2.1	0.3
C6-7	5.3	1.9	0.4
C3-1	4.8	1.5	0.4
C3-2	4.4	1.6	0.2
C3-3	5.1	1.5	0.3
C3-4	4.8	1.4	0.2
C3-5	4.9	1.3	0.2
C3-6	4.8	1.6	0.5
C3-7	4.5	1.3	0.4
C3-8	5.5	1.4	0.5
C3-9	4.7	1.3	0.2
C3-10	4.8	1.4	0.2
C3-11	5.5	1.6	0.2
C3-12	4.5	1.4	0.5
C3-13	5.1	1.5	0.4
C3-14	4.3	1.3	0.3
C3-15	4.7	1.4	0.2
C3-16	4.7	1.5	0.3
C1-1	5.1	1.4	0.3
C1-2	5.3	1.6	0.4
C1-3	5.1	1.4	0.2
C1-4	5	1.6	0.2
C1-5	4.8	1.4	0.4
C1-6	5.3	1.4	0.4
C1-7	4.9	1.3	0.2
C1-8	4.7	1.5	0.2
C1-9	4.7	1.4	0.4
C1-10	4.4	1.3	0.2
C1-11	4.3	1.3	0.4
C1-12	5	1.4	0.2
C1-13	4.3	1.3	0.2
C1-14	5.1	1.6	0.4
C1-15	4.2	1.2	0.2
CX1-1	5.5	1.5	0.4
CX1-2	5	1.6	0.2
CX1-3	5.2	1.6	0.2
CX1-4	5.1	1.5	0.2
CX1-5	4.8	1.7	0.2
CX1-6	4.6	1.7	0.2
CX1-7	4.7	1.7	0.2
CX1-8	5.2	1.7	0.3
CX1-9	5	1.7	0.2
CX1-10	4.9	1.4	0.3
CX1-11	4.9	1.6	0.2
CX1-12	4.9	1.7	0.3
CX1-13	4.9	1.6	0.4
CX1-14	5.4	1.7	0.4
CX1-15	4.8	1.6	0.4
CX1-16	4.8	1.5	0.4
L2-1	5.1	1.2	0.2
L2-2	4.9	1.3	0.3
L2-3	4.3	1.5	0.2
L2-4	4.7	1.5	0.2
L2-5	4.3	1.3	0.2
L2-6	4.5	1.3	0.2
L2-7	4.5	1.5	0.2
L2-8	4.6	1.3	0.2
L2-9	4.5	1.4	0.2
L2-10	4.7	1.4	0.2
L2-11	4.8	1.6	0.4
L2-12	4.7	1.4	0.2
L2-13	4.3	1.3	0.2
L2-14	4.8	1.4	0.4
L8-1	5	1.5	0.4
L8-2	5.2	1.5	0.2
L8-3	4.8	1.8	0.2
L8-4	5	1.7	0.2
L8-5	5	1.6	0.5
L8-6	4.9	1.7	0.2
L8-7	5	1.5	0.4
L8-8	5	1.7	0.4
L8-9	5	1.6	0.5
L8-10	5	1.6	0.2
L8-11	4.7	1.7	0.2
L8-12	4.6	1.5	0.4
L8-13	4.8	1.7	0.2
L8-14	5	1.4	0.4
L8-15	4.6	1.6	0.2
L10-1	4.8	1.6	0.2
L10-2	4.7	1.7	0.2
L10-3	4.8	1.7	0.4
L10-4	5	1.6	0.4
L10-5	4.9	1.8	0.2
L10-6	4.9	1.7	0.2
L10-7	4.6	1.6	0.2
L10-8	4.8	1.4	0.4
L10-9	4.6	1.6	0.2
L10-10	4.7	1.8	0.2
L10-11	5	1.6	0.4
L10-12	4.9	1.8	0.4
L10-13	4.6	1.6	0.2
L10-14	4.6	1.6	0.4
L9-1	4.5	1.6	0.2
L9-2	5.2	1.8	0.4
L9-3	4.8	1.4	0.3
L9-4	4.5	1.4	0.3
L9-5	5	1.8	0.4
L9-6	5.2	1.8	0.5
L9-7	4.7	1.4	0.5
L9-8	4.6	1.5	0.3
L9-9	4.8	1.6	0.2
L9-10	4.6	1.7	0.2
L9-11	4.6	1.3	0.3
L9-12	4.6	1.8	0.5
L4-1	4.7	1.8	0.2
L4-2	4.7	1.6	0.4
L4-3	4.8	1.6	0.4
L4-4	4	1.6	0.3
L4-5	4.6	1.6	0.2
L4-6	4.3	1.6	0.2
L4-7	4.2	1.6	0.2
L4-8	4.7	1.8	0.2
L4-9	4.2	1.6	0.2
L4-10	4.7	1.4	0.3
L4-11	4.8	1.8	0.2
L4-12	4	1.6	0.2
L4-13	4.5	1.8	0.2
L4-14	4.4	1.7	0.5
L4-15	4.7	1.7	0.2
L4-16	4.6	1.5	0.5
L4-17	5	1.4	0.4
LX1-1	4.7	1.7	0.2
LX1-2	5.4	1.7	0.4
LX1-3	5.2	1.3	0.2
LX1-4	4.8	1.5	0.5
LX1-5	5	1.5	0.3
LX1-6	4.5	1.5	0.2
LX1-7	4.5	1.5	0.2
LX1-8	4.7	1.4	0.5
LX1-9	4.9	1.7	0.4
LX1-10	5	1.5	0.4
LX1-11	5.3	1.5	0.4
LX1-12	4.5	1.5	0.2
LX1-13	5	1.4	0.4
LX1-14	4.8	1.6	0.2
LX1-15	4.8	1.6	0.2
LX3-1	4.7	1.5	0.2
LX3-2	4.7	1.6	0.2
LX3-3	5.1	1.6	0.2
LX3-4	5.1	1.6	0.4
LX3-5	4.9	1.4	0.4
LX3-6	5.1	1.8	0.2
LX3-7	5.4	1.7	0.5
LX3-8	4.9	1.5	0.3
LX3-9	4.8	1.7	0.2
LX3-10	4.8	1.7	0.4
LX3-11	4.9	1.6	0.2
LX3-12	4.6	1.6	0.2
LX3-13	4.6	1.4	0.2
LX3-14	4.9	1.4	0.4
LX5-1	5	1.9	0.2
LX5-2	5.2	1.7	0.4
LX5-3	5	1.7	0.2
LX5-4	5.2	1.5	0.4
LX5-5	5.3	1.7	0.5
LX5-6	4.8	1.9	0.2
LX5-7	5.3	1.4	0.4
LX5-8	5.2	1.6	0.4
LX5-9	4.6	1.5	0.2
LX5-10	5	1.8	0.2
LX5-11	5	1.6	0.2
LX5-12	4.8	1.7	0.2
LX5-13	4.9	1.7	0.2
MX1-1	5	1.7	0.2
MX1-2	4.6	1.6	0.2
MX1-3	4.5	1.8	0.2
MX1-4	4.6	1.9	0.4
MX1-5	5	1.8	0.4
M11-1	5.4	1.6	0.2
M11-2	5	1.5	0.4
M11-3	5	1.6	0.4
M11-4	4.6	1.6	0.2
M11-5	5	1.6	0.2
M11-6	5	1.6	0.4
M11-7	5	1.6	0.4
M11-8	5	1.6	0.4
M11-9	5	1.6	0.4
M11-10	5	1.6	0.4
M11-11	5	1.6	0.4
M9-1	5	1.6	0.2
M9-2	5.2	1.7	0.2
M9-3	4.8	1.9	0.3
M9-4	5.5	1.6	0.2
M9-5	5.2	1.8	0.4
M9-6	5.3	1.6	0.2
M9-7	5.2	1.8	0.3
M9-8	5.5	1.7	0.3
M9-9	4.5	1.6	0.2
M3-1	4.6	1.6	0.1
M3-2	5.2	1.8	0.5
M3-3	4.6	1.6	0.2
M3-4	4.8	1.4	0.2
M3-5	4.9	1.7	0.5
M3-6	5.3	1.9	0.4
M3-7	5	1.8	0.1
M3-8	4.6	1.5	0.4
M3-9	4.6	1.6	0.2
M3-10	4.7	1.8	0.5
M3-11	5	1.7	0.2
M3-12	4.7	1.7	0.2
M3-13	4.8	1.5	0.5
H1-1	5.2	1.4	0.5
H1-2	5.2	1.4	0.2
H1-3	4.9	1.7	0.4
H1-4	5	1.6	0.2
H1-5	5	1.7	0.2
H1-6	5.1	1.8	0.5
H6-1	4.6	1.5	0.2
H6-2	4.6	1.6	0.2
H6-3	4.7	1.6	0.2
H6-4	4.6	1.8	0.4
H6-5	4.9	1.5	0.3
H6-6	4.8	1.6	0.2
H6-7	4.7	1.7	0.5
H6-8	4.6	1.6	0.2
H6-9	4.6	1.5	0.3
H6-10	4	1.3	0.2
H6-11	4.4	1.5	0.2
H6-12	4.7	1.6	0.4
HX2-1	5.2	1.5	0.2
HX2-2	5.5	1.9	0.2
HX2-3	5.6	1.7	0.4
HX2-4	5.4	1.9	0.4
HX2-5	5.3	1.9	0.5
HX2-6	5.1	1.7	0.4
HX2-7	5	1.8	0.2
HX2-8	5	2	0.2
HX2-9	5.4	1.8	0.2
HX4-1	4.9	1.6	0.4
HX4-2	5.1	1.8	0.2
HX4-3	4.9	1.6	0.3
HX4-4	4.9	1.9	0.4
HX4-5	5.2	1.7	0.2
HX4-6	5.3	1.5	0.4
HX4-7	5.3	1.6	0.2
HX4-8	5.3	1.5	0.2
HX7-1	4.5	1.6	0.2
HX7-2	4.7	1.5	0.4
HX7-3	4.8	1.4	0.4
HX7-4	4.4	1.5	0.4
HX7-5	4.6	1.3	0.2
HX7-6	4.9	1.5	0.2
HX7-7	4.6	1.2	0.2
HX7-8	4.8	1.6	0.4
HX7-9	4.5	1.7	0.2
HX7-10	5	1.9	0.4
HX7-11	4.7	1.8	0.2
HX7-12	4.4	1.6	0.4
HX7-13	5	1.5	0.5
HX7-14	4.7	1.9	0.2
HX7-15	4.5	1.6	0.4
YX2-1	4.2	1.6	0.2
YX2-2	4.4	1.7	0.2
YX2-3	4.2	1.5	0.2
YX2-4	4.3	1.5	0.2
YX2-5	4.2	1.7	0.2
YX2-6	4.6	1.5	0.4
YX2-7	4.7	1.6	0.3
YX2-8	4.7	1.5	0.2
YX2-9	4.4	1.6	0.2
YX2-10	4.6	1.7	0.4
YX2-11	4.2	1.4	0.4
YX2-12	4.2	1.6	0.2
YX2-13	4	1.5	0.2
YX2-14	4.2	1.7	0.2
YX2-15	4.8	1.6	0.4
YX2-16	4.7	1.7	0.2
YX2-17	4.7	1.6	0.4
Y1-1	4.9	1.6	0.2
Y1-2	5	1.6	0.4
Y1-3	5	1.7	0.4
Y1-4	4.8	0	0.2
Y1-5	5.2	1.5	0.2
Y1-6	5.1	1.6	0.4
Y1-7	5	1.5	0.4
Y1-8	5	1.5	0.4
Y1-9	5.2	1.6	0.2
Y1-10	5.3	1.7	0.4
Y1-11	4.8	1.6	0.2
Y6-1	4.6	1.4	0.2
Y6-2	5.1	1.9	0.4
Y6-3	4.9	1	0.2
Y6-4	4.6	1.6	0.2
Y6-5	4.8	1.6	0.2
Y6-6	4.5	1.6	0.4
Y6-7	4.9	1.6	0.4
Y6-8	4.6	1.5	0.4
Y6-9	4.8	1.5	0.2
Y6-10	5	1.4	0.4
Y6-11	4.7	1.7	0.4
Y6-12	5.1	1.8	0.2
Y6-13	4.5	1.6	0.2
Y6-14	5.2	1.3	0.2
Y3-1	5.1	1.6	0.25
Y3-2	4.8	1.4	0.2
Y3-3	4.6	1.3	0.4
Y3-4	4.6	1.2	0.2
Y3-5	4.4	1.4	0.2
Y3-6	4.9	1.4	0.3
Y3-7	5	1.2	0.4
Y3-8	4.6	1.3	0.2
Y3-9	5.1	1.3	0.3
Y3-10	5	1.4	0.4
Y3-11	4.6	1.2	0.2
Y3-12	4.8	1.6	0.4
Y3-13	4.7	1.4	0.4
Y3-14	4.6	1.4	0.2
Y5-1	5.1	1.9	0.4
Y5-2	5.1	1.8	0.2
Y5-3	5.3	1.8	0.2
Y5-4	5.3	1.7	0.4
Y5-5	5.4	1.7	0.3
Y5-6	5.1	1.5	0.3
Y5-7	5.3	1.7	0.2
Y5-8	5.4	1.7	0.2
Y5-9	5.1	1.8	0.2
YX1-1	5.3	1.7	0.2
YX1-2	5.3	1.7	0.4
YX1-3	5.1	1.7	0.2
YX1-4	5.2	1.8	0.4
YX1-5	4.8	1.7	0.2
YX1-6	5.4	1.8	0.5
YX1-7	5.4	1.6	0.2
YX1-8	4.9	1.7	0.4

## Sheet: PND 0 litter weight
group	PND 0 litter weight
C	71.71
C	80.48
C	82.9
C	100.32
C	104.72
C	51.97
C	101.4
C	81.2
C	91.7
L	82.7
L	67.4
L	80.4
L	105.7
L	79.7
L	79.5
L	94.8
L	99.6
L	82.9
M	56.96
M	61.6
M	74.8
M	62.25
M	65.78
M	36.9
M	85.4
H	56.4
H	72.12
H	70.18
H	41.4
H	72.6
H	61.8
H	63.6
H	99.6
E2	69.04
E2	76.86
E2	63.62
E2	80.22
E2	51
E2	95.6

## Sheet: Average litter size (n) 
group	Average litter size (n)
C	16
C	16
C	16
C	12
C	14
C	8
C	13
C	14
C	16
L	15
L	17
L	14
L	18
L	13
L	16
L	16
L	15
L	12
L	14
M	8
M	14
M	11
M	9
M	13
M	11
M	5
M	13
H	12
H	12
H	11
H	4
H	6
H	10
H	8
H	12
H	15
E2	11
E2	14
E2	9
E2	14
E2	8
E2	17
E2	8

## Sheet: PND 73 Body weight (g)
group	PND 73 Body weight (g)
C	269.6
C	253.8
C	235
C	246.7
C	253.7
C	319.3
C	267.2
C	211.4
C	283.6
L	191.3
L	210.8
L	178.2
L	251.6
L	254.3
L	266.5
L	216.2
L	239.9
L	256.8
M	222.2
M	252.8
M	241.5
M	279.5
M	246.5
M	266.9
M	325.7
M	318.7
M	250.6
M	262.8
H	294.5
H	313.6
H	313.9
H	292.7
H	320.3
H	290.3
H	223.9
H	231.6
E2	249.8
E2	211.5
E2	217.3
E2	224.2
E2	268.4
E2	226.9
E2	273.9
E2	207.8
E2	230.4

## Sheet: NP concentration in thyroid  (n
group	NP concentration in thyroid (ng/mg)
C	3.144
C	2.828
C	2.634
C	3.436
C	2.575
C	2.852
C	3.485
C	2.582
C	2.576
C	2.804
L	4.40089
L	3.95856
L	3.68701
L	4.80962
L	3.60442
L	3.99216
L	4.87821
L	3.61422
L	3.60582
L	3.92497
M	8.30295
M	7.46843
M	6.9561
M	9.07409
M	6.80028
M	7.53181
M	9.20349
M	6.81877
M	6.80293
M	7.40505
H	15.6648
H	14.0903
H	13.1237
H	17.1197
H	12.8298
H	14.2099
H	17.3638
H	12.8646
H	12.8347
H	13.9708

## Sheet: Area(um2)
group	Area(um2)
C	1595.53
C	2416.91
C	1549.04
C	1253.75
C	1994.2
C	2619.3
C	424.506
C	615.323
C	181.217
L	1257.29
L	1254.87
L	194.542
L	208.032
L	152.783
L	93.668
L	719.343
L	229.043
L	296.678
L	284.844
L	1206.59
L	298.834
L	298.019
L	893.873
L	2305.53
L	679.556
L	1144.43
L	476.546
L	336.149
L	690.259
M	914.843
M	602.214
M	142.884
M	94.576
M	463.751
M	128.002
M	1840.15
M	99.911
M	360.832
M	1462.55
M	888.793
M	50.531
M	560.89
M	579.617
M	483.969
M	1245.34
M	24.062
M	44.437
M	269.055
M	523.593
M	565.493
M	276.666
M	470.211
M	34.158
M	283.047
H	309.703
H	62.071
H	443.054
H	177.341
H	563.84
H	468.548
H	661.707
H	342.638
H	414.724
H	67.716
H	83.845
H	32.96
H	399.194
H	69.459
H	581.634
H	429.214
H	875.052
H	342.768
H	196.41
H	345.265
H	51.587
H	65.999
E2	222.581
E2	243.574
E2	137.513
E2	164.776
E2	418.548
E2	337.617
E2	228.46
E2	305.411
E2	314.854
E2	548.179
E2	1073.36
E2	119.537
E2	184.287
E2	116.441
E2	283.377
E2	566.285
E2	330.931
E2	1657.86
E2	439.62
E2	430.515
E2	179.266
E2	347.112
E2	156.582
E2	208.429
E2	266.233
E2	640.401
E2	298.257
E2	141.857
E2	64.62
E2	369.641
E2	236.863
E2	153.98
E2	303.954
E2	366.701
E2	104.188
E2	344.277

## Sheet: thickness(um)
group	thickness(um)
C	1.94
C	1.94
C	1.94
C	1.94
C	2.1
C	1.77
C	2.1
C	1.94
C	2.42
C	3.23
C	1.77
C	1.77
C	2.1
C	1.77
C	2.1
L	1.9
L	2.86
L	2.54
L	2.22
L	2.86
L	1.9
L	2.22
L	1.9
L	2.22
L	2.54
L	1.9
L	2.22
L	2.22
L	2.86
L	2.86
L	2.86
L	2.54
L	1.9
L	3.17
L	3.17
L	4.13
L	2.22
M	2.26
M	1.94
M	3.55
M	3.87
M	3.23
M	2.58
M	2.26
M	2.9
M	2.58
M	2.58
M	1.94
M	1.94
M	2.26
M	2.58
M	2.58
M	2.26
M	2.9
M	1.94
M	1.94
H	2.26
H	1.94
H	3.55
H	3.87
H	3.23
H	2.58
H	2.26
H	2.9
H	2.58
H	2.58
H	1.94
H	1.94
H	2.26
H	2.58
H	2.58
H	2.26
H	2.9
H	1.94
H	1.94
H	2.72
H	3.36
H	7.2
E2	2.19
E2	2.19
E2	2.19
E2	3.44
E2	1.87
E2	2.81
E2	4.06
E2	2.81
E2	2.19
E2	2.7
E2	2.81
E2	2.68
E2	2.19
E2	1.87
E2	3.44
E2	2.81
E2	2.19
E2	2.7
E2	3.75
E2	1.87
E2	2.7

## Sheet: hormone
group	FT3 (nmol/L)	FT4 (nmol/L)	TSH (uIU/L)
C	1.15	77.8	0.003
C	1.13	77.4	0.004
C	1.17	84.4	0.005
C	1.16	77.9	0.003
C	1.14	77.5	0.004
C	1.18	84.5	0.005
L	1.15	53.6	0.005
L	1.02	50.8	0.003
L	1	51.8	0.003
L	1.14	53.8	0.004
L	1.04	50.9	0.004
L	1.03	52	0.004
M	1.01	66.1	0.005
M	1.02	42.4	0.006
M	1.05	62.4	0.004
M	1.02	65	0.002
M	1.03	42.8	0.003
M	1.06	62	0.002
H	1.1	50.3	0.002
H	1.11	52.9	0.003
H	1.07	59.3	0.005
H	1.08	50.4	0.002
H	1.09	52.8	0.005
H	1.05	59.1	0.002
E2	1.12	59.4	0.005
E2	1.1	60.6	0.003
E2	0.95	54.7	0.002
E2	0.92	59.3	0.003
E2	1.11	60.4	0.003
E2	0.94	54.6	0.005

## Sheet: Number of live pups per litter
group	Number of live pups per litter
C	13
C	16
C	16
C	12
C	14
C	6
C	13
C	7
C	16
L	15
L	14
L	14
L	17
L	13
L	16
L	16
L	15
L	12
L	14
M	8
M	0
M	10
M	8
M	0
M	10
M	5
M	13
H	0
H	12
H	11
H	4
H	6
H	9
H	8
H	12
H	15
E2	11
E2	13
E2	9
E2	13
E2	8
E2	15
E2	0
